# Supplementary material
Source: MDPI journal article supplement (https://www.mdpi.com/1999-4907/12/12/1688)
Supplement: s1 [file s1]

**Table S1.** The selected National Forest Park and its basic information.

| No. | Park name              | Grade | Entrance<br>fee(¥) | Date of<br>establishment | Date ranking | Area (ha.) | Area ranking | Located city       | No. of Reponses | Response-rate |
|-----|------------------------|-------|--------------------|--------------------------|--------------|------------|--------------|--------------------|-----------------|---------------|
| 1   | Dalian Yin Shitan NFP  | 0     | 50                 | 2005.12                  | 573          | 570.00     | 854          | Dalian, Liaoning   | 207             | 69.00%        |
| 2   | Shandong Mengshan      | 5A    | 80                 | 1994.12                  | 221          | 3675.87    | 494          | Linyi, Shandong    | 198             | 66.00%        |
| 3   | Shandong Lashan NFP    | 0     | 50                 | 1996.08                  | 253          | 723.00     | 836          | Taian, Shandong    | 220             | 73.33%        |
| 4   | Henan Yun Taishan NFP  | 5A    | 135                | 1993.05                  | 188          | 2000.00    | 865          | Jiaozuo, Henan     | 204             | 68.00%        |
| 5   | Heilongjiang Wei       | 3A    | 70                 | 1993.01                  | 210          | 414756.00  | 1            | Mudanjiang, Hei    | 196             | 65.33%        |
| 6   | Shanxi Taiping NFP     | 4A    | 65                 | 2004.12                  | 557          | 6085.00    | 344          | Xi'an, Shanxi      | 199             | 66.33%        |
| 7   | Jilin Zhu Queshan NFP  | 0     | 30                 | 2001.11                  | 342          | 5662.00    | 373          | Jilin, Jilin       | 218             | 72.67%        |
| 8   | Shanxi Tai Baishan NFP | 5A    | 100                | 1991.08                  | 12           | 2949.00    | 576          | Baoji, Shanxi      | 227             | 75.67%        |
| 9   | Liaoning Hemu NFP      | 4A    | 50                 | 2008.01                  | 660          | 1367.85    | 756          | Fushun, Liaoning   | 219             | 73.00%        |
| 10  | Jiangsu Da Yangshan    | 4A    | 70                 | 2009.02                  | 705          | 1029.80    | 796          | Suzhou, Jiangsu    | 207             | 69.00%        |
| 11  | Jilin Wu Nvfeng NFP    | 4A    | 65                 | 1992.11                  | 117          | 6866.67    | 310          | Tonghua, Jilin     | 203             | 67.67%        |
| 12  | Hei Longjiang Wuying   | 4A    | 60                 | 1993.01                  | 211          | 14141.00   | 166          | Yichun, Hei        | 216             | 72.00%        |
| 13  | Zhejiang Qiandaohu     | 5A    | 215                | 1990.06                  | 7            | 95000.00   | 19           | Hangzhou, Zhejiang | 174             | 58.00%        |
| 14  | Hebei Saihanba NFP     | 5A    | 150                | 1993.05                  | 160          | 94000.00   | 25           | Chengde, Hebei     | 198             | 66.00%        |
| 15  | Beijing Badaling NFP   | 3A    | 35                 | 2005.12                  | 562          | 2940.00    | 531          | Beijing            | 178             | 89.00%        |
| 16  | Shanghai Dongping NFP  | 4A    | 70                 | 1993.05                  | 172          | 355.00     | 866          | Shanghai           | 201             | 67.00%        |
| 17  | Jiangxi Sanzhualun NFP | 5A    | 30                 | 1993.03                  | 157          | 12396.23   | 187          | Yichun, Jiangxi    | 216             | 72.00%        |
| 18  | Henan Yawushan NFP     | 0     | 30                 | 1992.11                  | 134          | 15133.33   | 158          | San Menxia, Henan  | 198             | 66.00%        |
| 19  | Hunan Shennonggu NFP   | 4A    | 75                 | 1992.07                  | 43           | 10000.00   | 221          | Zhuzhou, Hunan     | 203             | 67.67%        |
| 20  | Hefei Dashushan NFP    | 4A    | 0                  | 2013.01                  | 762          | 1003.01    | 799          | Hefei, anhui       | 200             | 66.67%        |
| 21  | Jilin Jingyuetan NFP   | 5A    | 30                 | 1989.11                  | 6            | 8330.00    | 262          | Changchun, Jilin   | 201             | 67.00%        |
| 22  | Liaoning Xian Rentai   | 0     | 30                 | 2002.12                  | 383          | 2931.00    | 580          | Anshan, Liaoning   | 248             | 82.67%        |

**Table S2.** The descriptive statistics result of individual characteristic.

[illegible]
